# Supplementary material for: Autophagy proteins regulate ERK phosphorylation
Source: PubMed Central journal article supplement (PMC3868163; doi:10.1038/ncomms3799), 2013-11-18
Supplement: ncomms3799-s1.pdf [file ncomms3799-s1.pdf]

## Supplementary Information

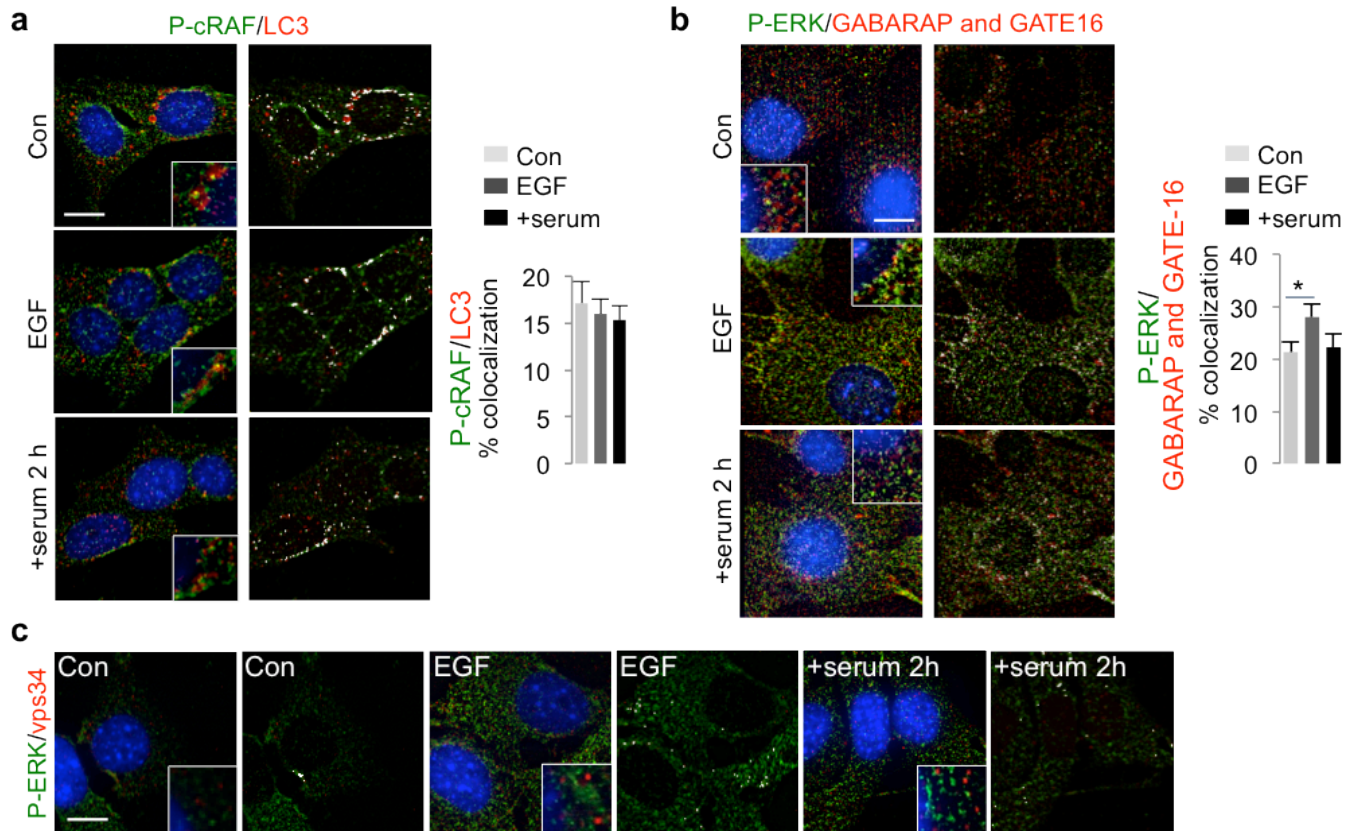

**Supplementary Figure S1 (a)** P-cRAF colocalizes with LC3 puncta. Immunofluorescence (IF) depicting colocalization of P-cRAF (green) and LC3 puncta (red) in NIH/3T3 cells treated with EGF for 10 min or serum for 2 h. Scale bar, 10  $\mu$ m. The bars represent mean  $\pm$  s.e.m. 60 cells analyzed from 2 experiments. Right panel depicts colocalization (white pixels) highlighted by “colocalization finder”. **(b)** P-ERK colocalizes with LC3 homologues GABARAP and GATE16. IF depicting colocalization of P-ERK (green) with GABARAP and GATE16 (red) in NIH/3T3 cells exposed to EGF for 10 min or serum for 2 h. Right panel depicts colocalization (white pixels) highlighted by “colocalization finder”. Scale bar, 10  $\mu$ m. The bars represent mean  $\pm$  s.e.m. \* $P$ <0.05 compared to Con; Student’s  $t$ -test, 60 cells analyzed from 2 experiments. **(c)** P-ERK colocalizes modestly with vps34. IF depicting colocalization of P-ERK (green) with vps34 (red) in NIH/3T3 cells exposed to EGF for 10 min or serum for 2 h. 60 cells analyzed from 2 experiments. Nuclei are in blue (DAPI). Scale bar, 10  $\mu$ m.

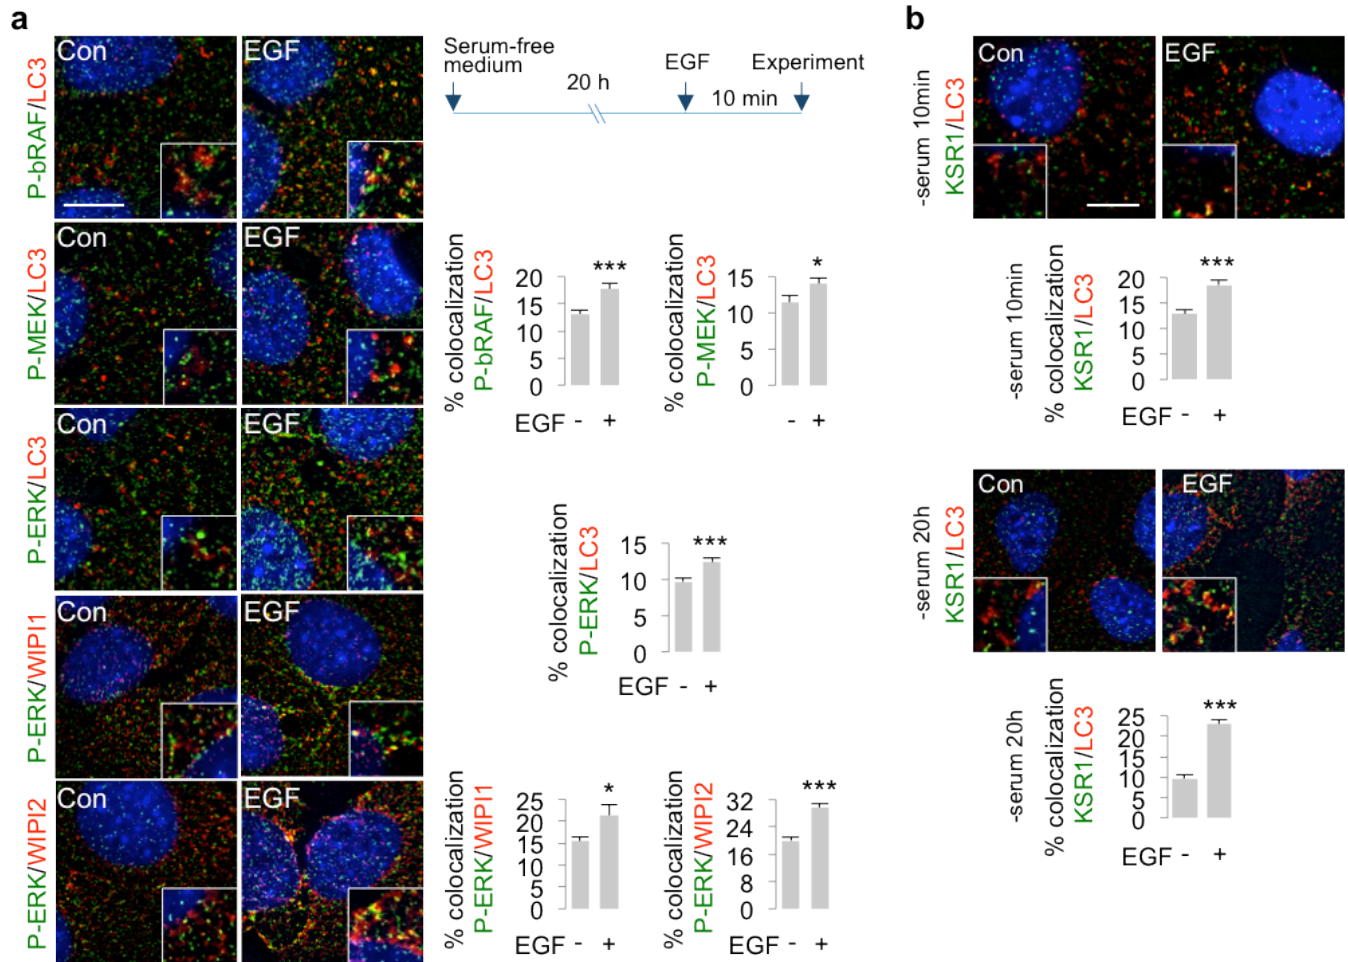

**Supplementary Figure S2 (a)** Components of the ERK signaling cascade colocalize with autophagy proteins in 20 h serum-deprivation cells. Immunofluorescence (IF) depicting colocalization of P-bRAF, P-MEK or P-ERK (green) with LC3 puncta, WIPI1 or WIPI2 (red) in 20 h serum-starved NIH/3T3 cells exposed to EGF for 10 min (scheme shown). Scale bar, 10  $\mu$ m. The bars represent mean  $\pm$  s.e.m. \* $P$ <0.05, \*\*\* $P$ <0.001 compared to control (Con); Student's  $t$ -test, 50 cells analyzed from 2 experiments. **(b)** ERK scaffold complex protein KSR1 (kinase suppressor of Ras) colocalizes with LC3 puncta. IF depicting colocalization of KSR1 with LC3 in 10 min **(b, top)** or 20 h **(b, bottom)** serum-starved NIH/3T3 cells treated or not with EGF for 10 min. Scale bar, 10  $\mu$ m. The bars represent mean  $\pm$  s.e.m. \*\*\* $P$ <0.001 compared to Con; Student's  $t$ -test, 50 cells analyzed from 2 experiments. Nuclei are in blue (DAPI).

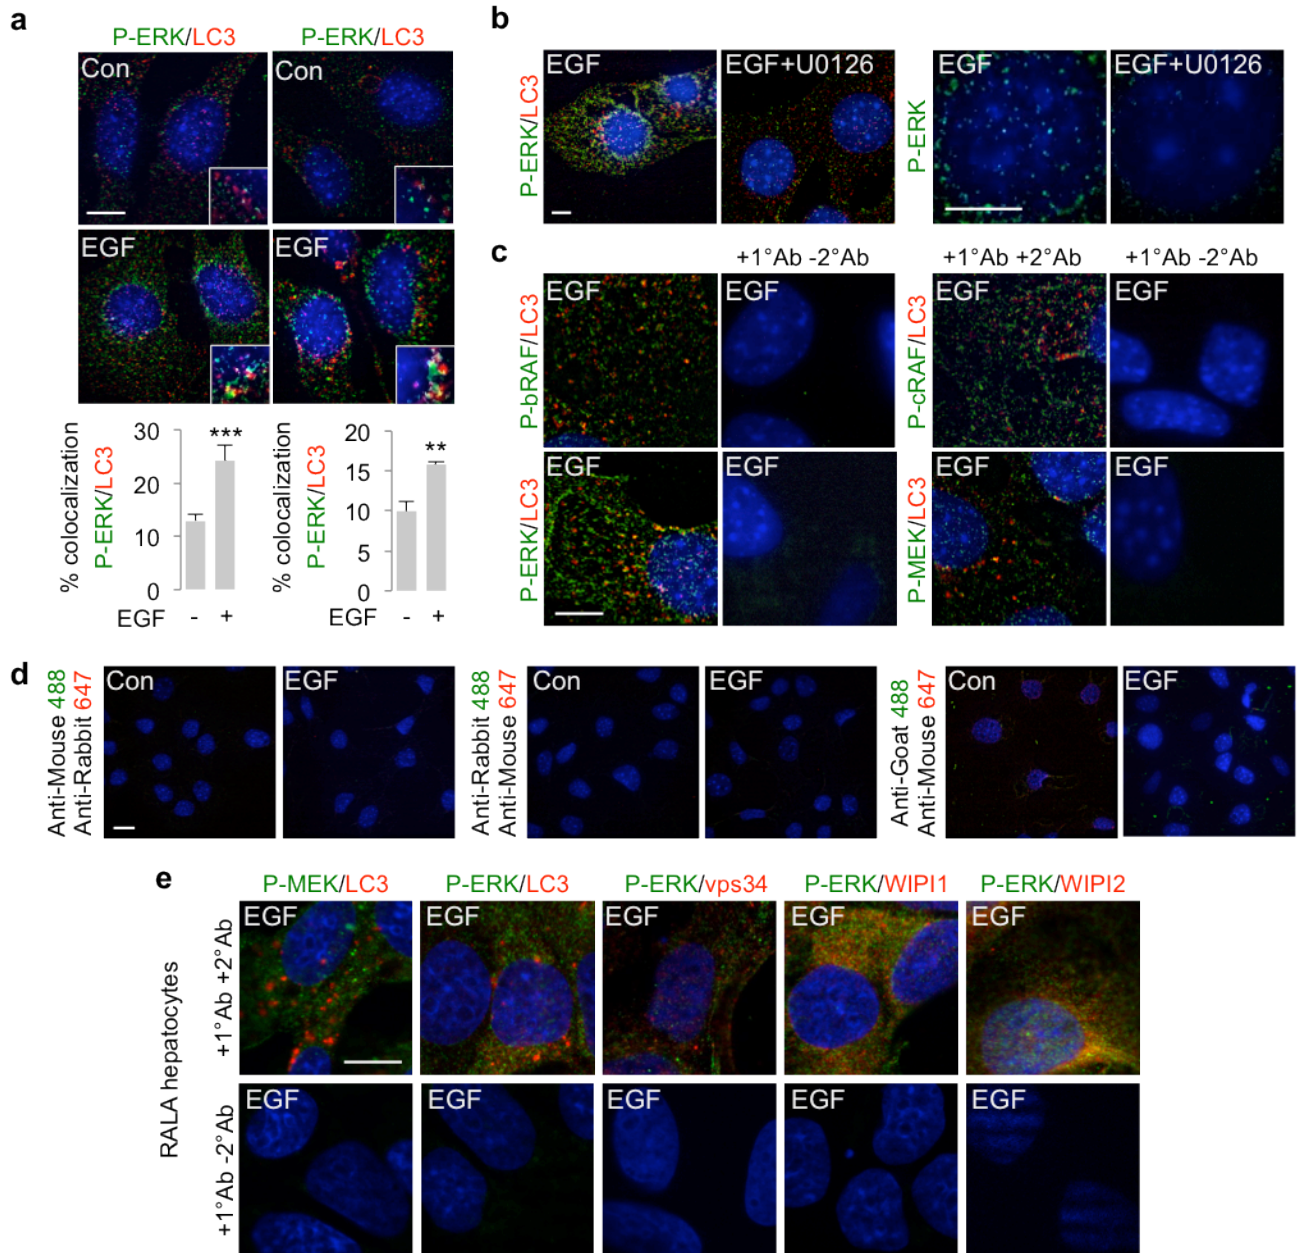

**Supplementary Figure S3** Primary antibody (1°Ab) and fluorescent-tagged secondary antibody specificities. **(a)** Validation of P-ERK/LC3 colocalizations. Immunofluorescence (IF) depicting colocalization of **(a, left)** P-ERK (rabbit 1°Ab) (green) and LC3 (mouse 1°Ab) (red), and **(a, right)** P-ERK (mouse 1°Ab) (green) and LC3 (rabbit 1°Ab) (red) in NIH/3T3 cells treated or not with EGF (10 min). Scale bar, 10  $\mu$ m. Bars represent mean  $\pm$  s.e.m. \*\* $P$ <0.01, \*\*\* $P$ <0.001 compared to Con; Student's  $t$ -test, 60 cells analyzed from 2 experiments. **(b)** Validation of P-ERK fluorescence. IF depicting reduced **(b, left)** cytoplasmic or **(b, right)** nuclear P-ERK (green) signal in 2 h U0126-pretreated NIH/3T3 cells exposed to EGF (10 min). LC3 is in red. 60 cells analyzed from 2 experiments. Scale bar, 5  $\mu$ m. **(c)** Antibody specificity in NIH/3T3 cells. IF in EGF-treated cells exposed to the indicated primary antibodies and corresponding secondary antibodies (+1°Ab +2°Ab) or only primary antibodies (+1°Ab -2°Ab). Scale bar, 10  $\mu$ m. **(d)** IF in EGF-treated NIH/3T3 cells exposed to secondary antibodies alone. Scale bar, 10  $\mu$ m. **(e)** Antibody specificities in RALA hepatocytes. IF in EGF-treated RALA cells exposed to the indicated primary antibodies and corresponding secondary antibodies (+1°Ab +2°Ab) or only primary antibodies (+1°Ab -2°Ab). Scale bar, 10  $\mu$ m. Nuclei are in blue (DAPI).

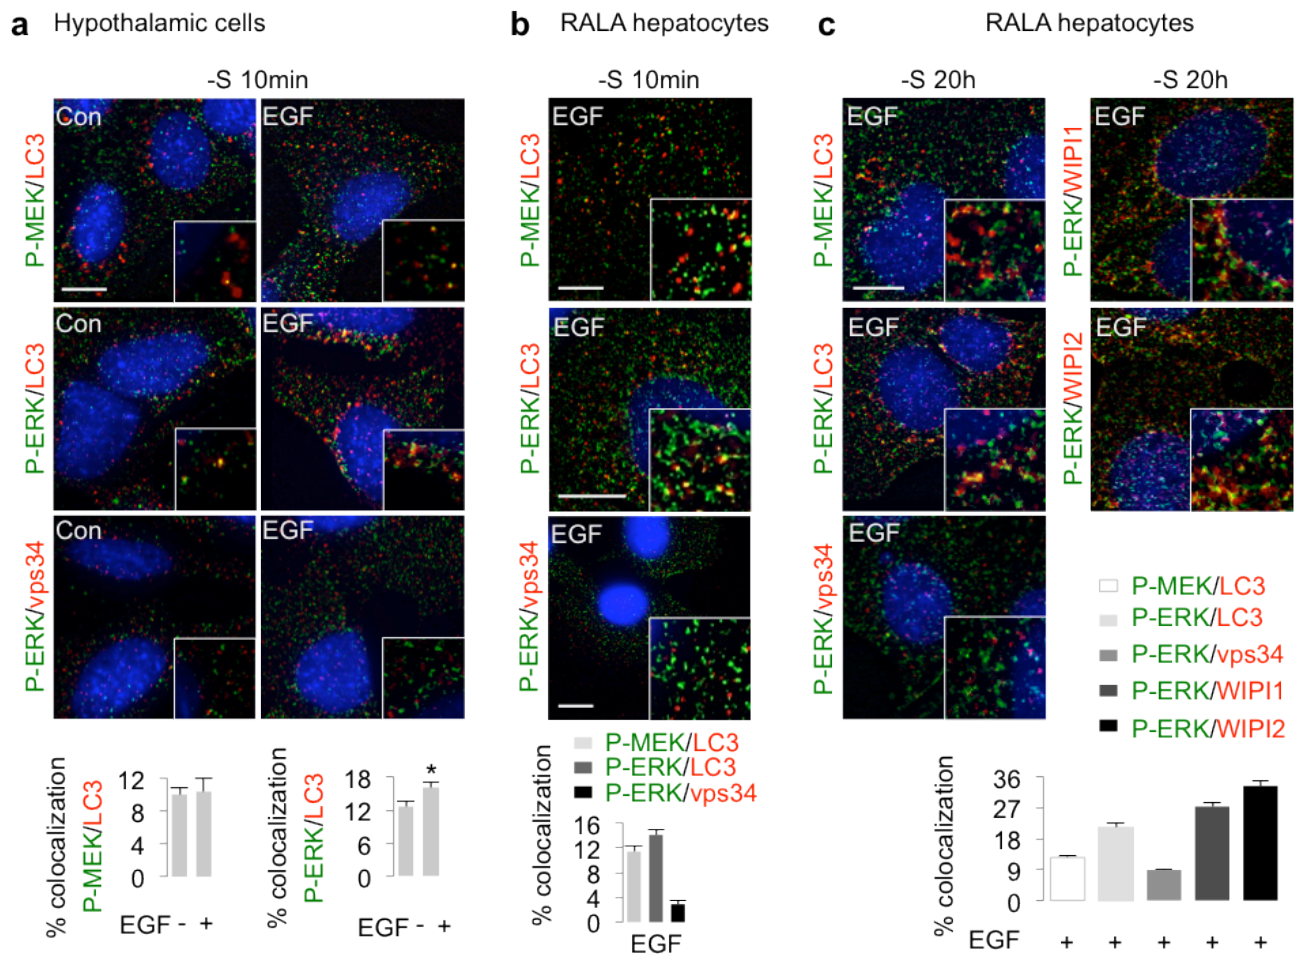

**Supplementary Figure S4** Immunofluorescence (IF) depicting colocalization of P-MEK (green) and P-ERK (green) with LC3 puncta (red) or vps34 (red) in **(a)** hypothalamic cells and **(b)** 10 min serum-starved RALA rat hepatocytes treated with EGF (10 min). Scale bars, 10  $\mu$ m. For panels, **a** and **b**, bars represent mean  $\pm$  s.e.m. \* $P$ <0.05 compared to EGF-untreated cells; Student's  $t$ -test, 60 cells were analyzed from 2 experiments. **(c)** IF showing colocalization of P-MEK (green) and P-ERK (green) with LC3-II, vps34, WIP11 or WIP12 (red) in 20 h serum-starved RALA hepatocytes treated with EGF (10 min). Scale bar, 10  $\mu$ m. The bars represent mean  $\pm$  s.e.m. 50 cells were analyzed from 2 experiments. Nuclei are in blue (DAPI).

**a** 3T3-L1

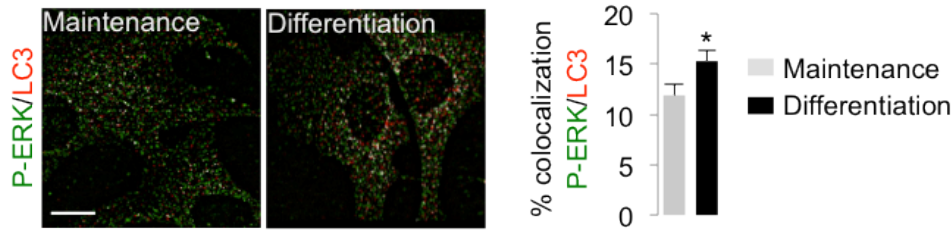

**b** NIH/3T3

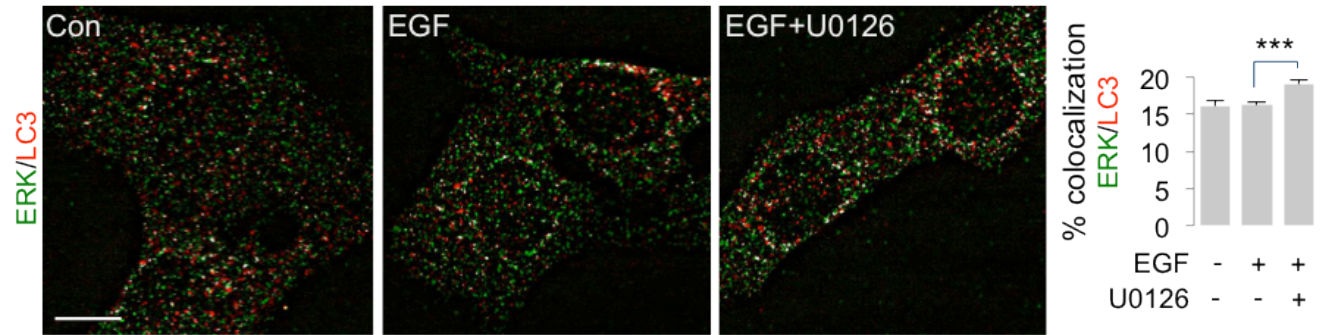

**Supplementary Figure S5 (a)** IF showing colocalizations of P-ERK (green) and LC3 puncta (red) in 3T3-L1 preadipocytes cultured in regular maintenance medium or in adipocyte differentiation medium (2 h). Bottom panel – colocalization (white pixels) highlighted by “colocalization finder”. Scale bar, 10  $\mu$ m. The bars represent mean  $\pm$  s.e.m. \* $P$ <0.05 compared to EGF-untreated cells; Student’s  $t$ -test, 60 cells analyzed from 2 experiments. **(b)** ERK phosphorylation is not a requirement for ERK to colocalize with LC3-II. IF showing colocalization of ERK (green)/LC3 (red) in 2 h U0126-pretreated NIH/3T3 cells exposed to EGF (10 min). Colocalization (white pixels) highlighted by “colocalization finder”. Scale bar, 10  $\mu$ m. The bars represent mean  $\pm$  s.e.m. \*\*\* $P$ <0.001 compared to EGF-untreated cells; Student’s  $t$ -test, 60 cells analyzed from 2 experiments.

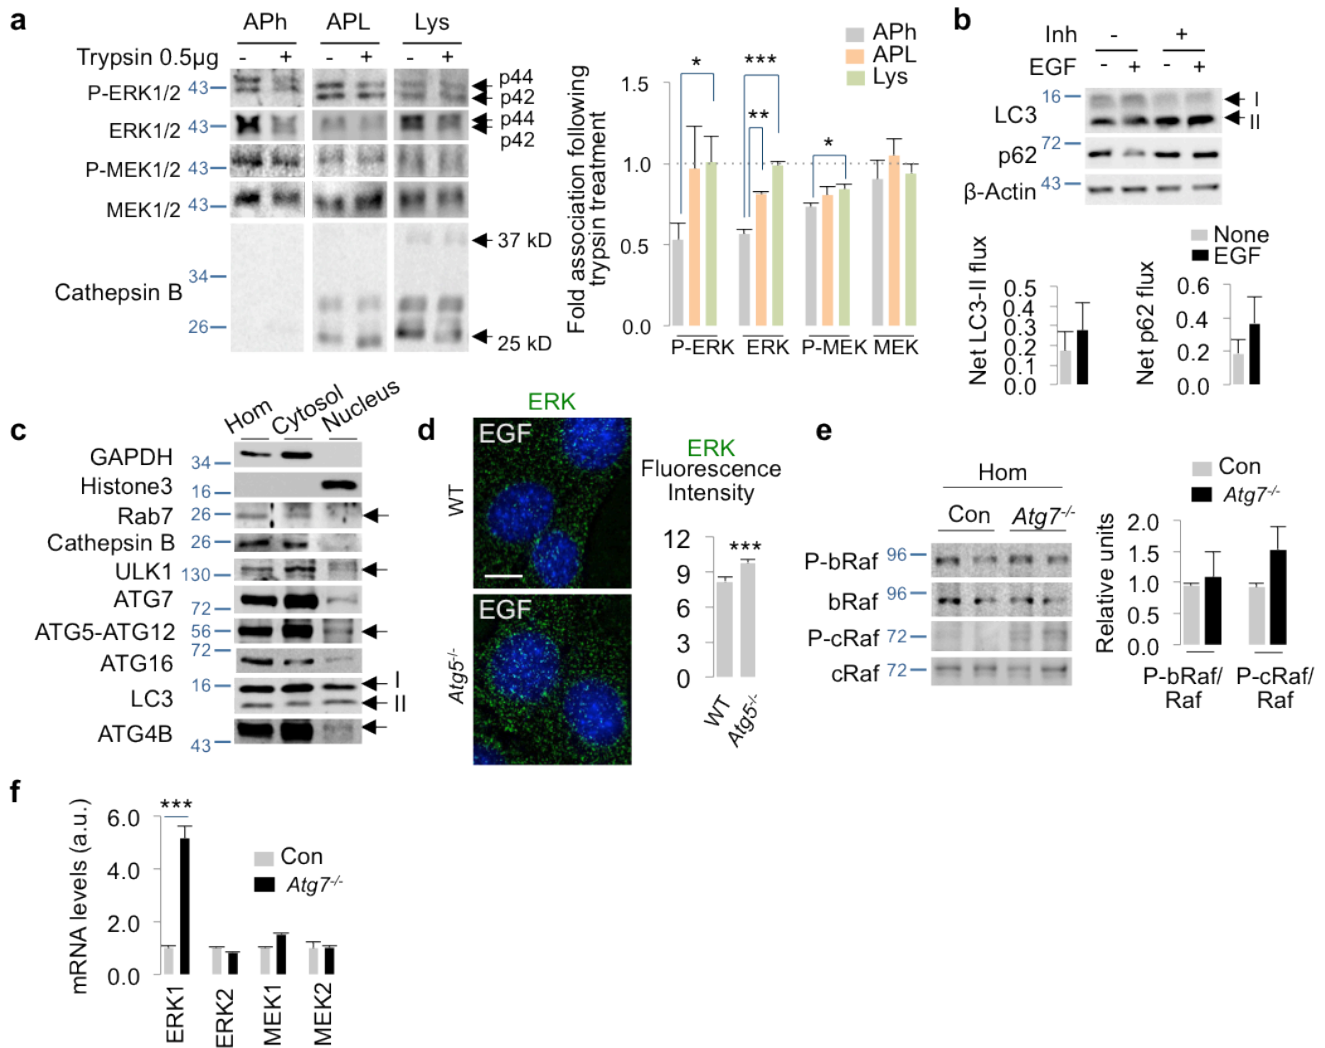

**Supplementary Figure S6 (a)** MEK and ERK localize to the extra-luminal face of autophagosomes (APh). Immunoblots show P- and total MEK and ERK in APh, autophagolysosome (APL) and lysosome (Lys) fractions isolated from mice livers and untreated (-) or treated with trypsin (0.5 µg for 15 min). Bars represent mean ± s.e.m. \* $P < 0.05$ , \*\* $P < 0.01$ , \*\*\* $P < 0.001$  compared to trypsin-induced dissociation in APh; Student's  $t$ -test,  $n = 3$ . The p44 and p42 forms of ERK are indicated. **(b)** Exposure to EGF does not affect net LC3-II or p62 flux. Immunoblots for LC3, p62 and β-actin in lysosomal inhibitor (Inh)-pretreated NIH/3T3 cells (2 hours) exposed to EGF (10 min). Bars represent mean ± s.e.m. Student's  $t$ -test,  $n = 5$ . **(c)** Presence of autophagy proteins in the nucleus. Immunoblots for ULK1, ATG7, ATG5-ATG12, ATG16, LC3 and ATG4B, and soluble nuclear marker histone3, soluble cytoplasmic marker GAPDH, endosomal marker Rab7 and lysosomal marker Cathepsin B in homogenate (Hom), cytosol and nuclear fractions from fed livers,  $n = 5$ . Rab7, ULK1, ATG5-ATG12, LC3-I and membrane-associated LC3-II are indicated. **(d)** Deleting *Atg5* increases nuclear total ERK content. IF for total ERK in EGF-treated WT and *Atg5<sup>-/-</sup>* MEFs. Scale bar, 10 µm. \*\*\* $P < 0.001$  compared to WT cells; Student's  $t$ -test, 50 cells analyzed from 2 experiments. **(e)** Loss of ATG7 does not affect phosphorylation of bRAF or cRAF. Immunoblots for P- and total bRAF and cRAF from Hom of Con and *ATG7<sup>-/-</sup>* livers. Bars represent mean ± s.e.m. Student's  $t$ -test,  $n = 4$ . **(f)** Loss of ATG7 increases ERK1 expression. Messenger RNA levels for *ERK1*, *ERK2*, *MEK1* and *MEK2* genes in Con and *Atg7<sup>-/-</sup>* livers. Bars represent mean ± s.e.m. \*\*\* $P < 0.001$  compared to Con; Student's  $t$ -test,  $n = 4$ .

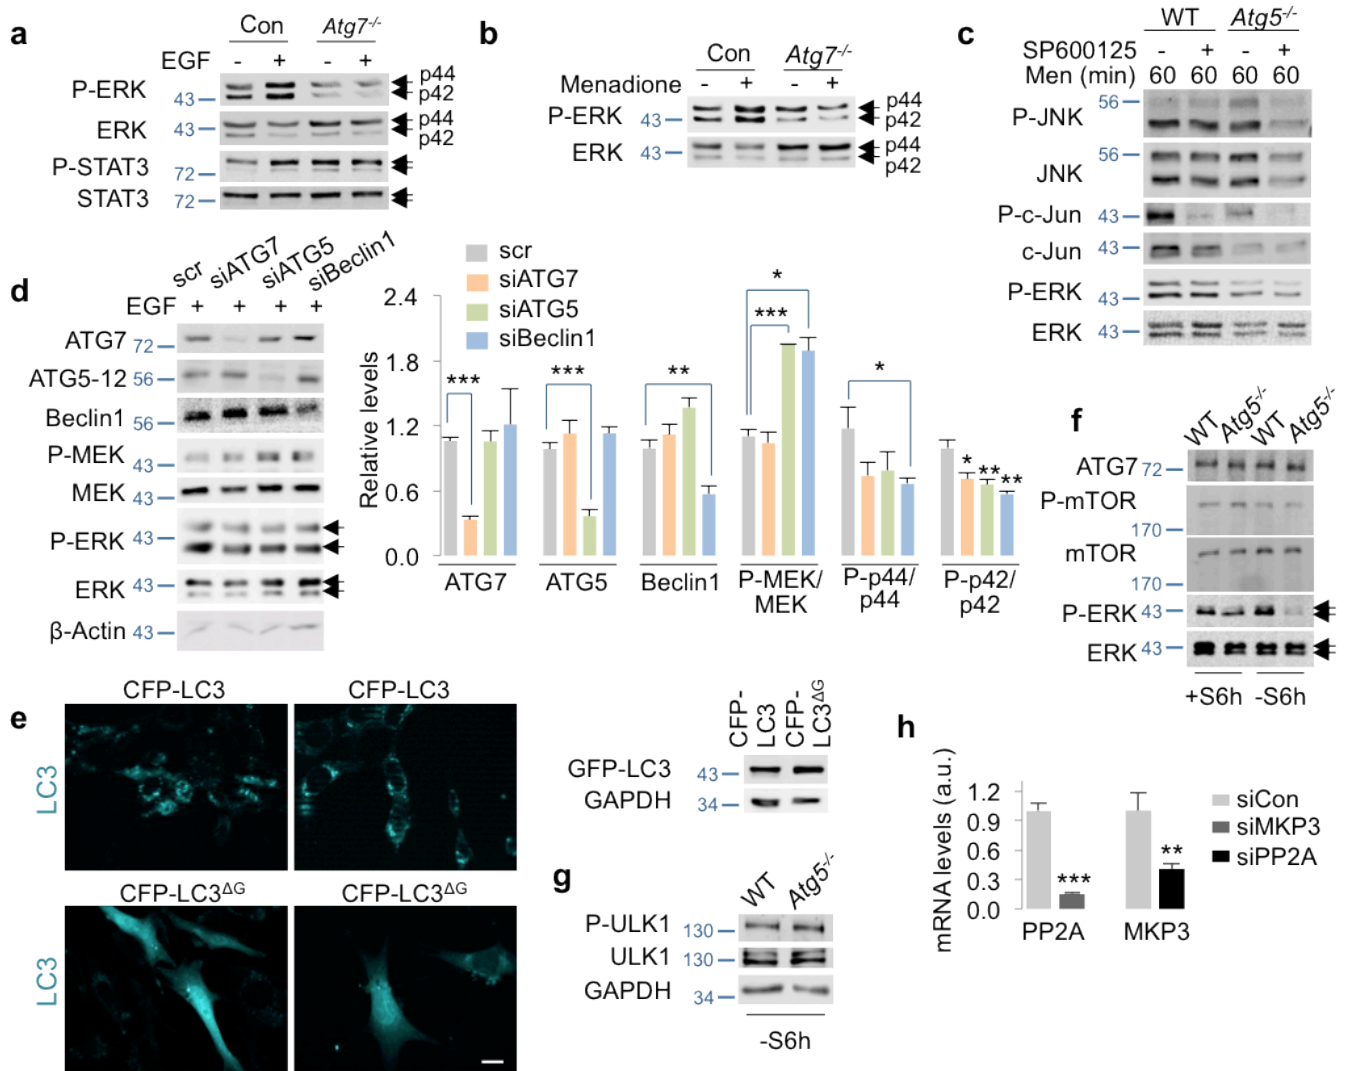

**Supplementary Figure S7** (a) *Atg7*<sup>-/-</sup> livers exhibit decreased ERK phosphorylation, but maintained STAT3 phosphorylation, in response to EGF. Immunoblots for P- and total ERK or STAT3 levels in fresh liver explants exposed to EGF, n = 4. (b) *Atg7*<sup>-/-</sup> livers display decreased ERK phosphorylation in response to menadione. Immunoblots for P- and total ERK levels in liver explants exposed to menadione, n = 4. (c) Blocking JNK/c-jun signaling does not modify ERK phosphorylation in WT or *Atg5*<sup>-/-</sup> MEFs. Immunoblots for P- and total JNK, c-jun and ERK in WT and *Atg5*<sup>-/-</sup> MEFs pretreated with JNK inhibitor SP600150 (30 min) and exposed to menadione (Men), n = 3. (d) Transiently silencing *Atg* genes decreases EGF-induced ERK phosphorylation. Immunoblots for ATG7, ATG5, Beclin1, P- and total MEK and ERK, and  $\beta$ -actin in total lysates from NIH/3T3 cells transiently transfected with scr, siATG7, siATG5 or siBeclin1, and treated with EGF (10 min). The p44/p42 forms of ERK are indicated. Bars represent mean  $\pm$  s.e.m. \**P*<0.05, \*\**P*<0.01, \*\*\**P*<0.001 compared to scr-transfected cells; Student's *t*-test, n = 4. (e) Immunofluorescence (e, left) and immunoblots (e, right) displaying equivalent expression of CFP in NIH/3T3 cells transfected with CFP-LC3- and CFP-LC3 <sup>$\Delta$ G</sup>, n = 8. Scale bar, 10  $\mu$ m. (f) Serum-starved *Atg5*<sup>-/-</sup> MEFs have decreased P-ERK levels but unaffected P-mTOR levels. Immunoblots for P- and total ERK and mTOR in 6 h serum-fed or serum-starved WT and *Atg5*<sup>-/-</sup> MEFs, n=3 (g) Serum-starved WT and *Atg5*<sup>-/-</sup> MEFs exhibit equivalent ULK1 phosphorylation. Immunoblots for P- and total ULK1 in 6 h serum-starved WT and *Atg5*<sup>-/-</sup> MEFs, n=3. (h) mRNA levels depicting MKP3 and PP2A knockdowns in *Atg5*<sup>-/-</sup> MEFs. Bars represent mean  $\pm$  s.e.m. \*\**P*<0.01, \*\*\**P*<0.001 compared to controls; Student's *t*-test, n = 5.

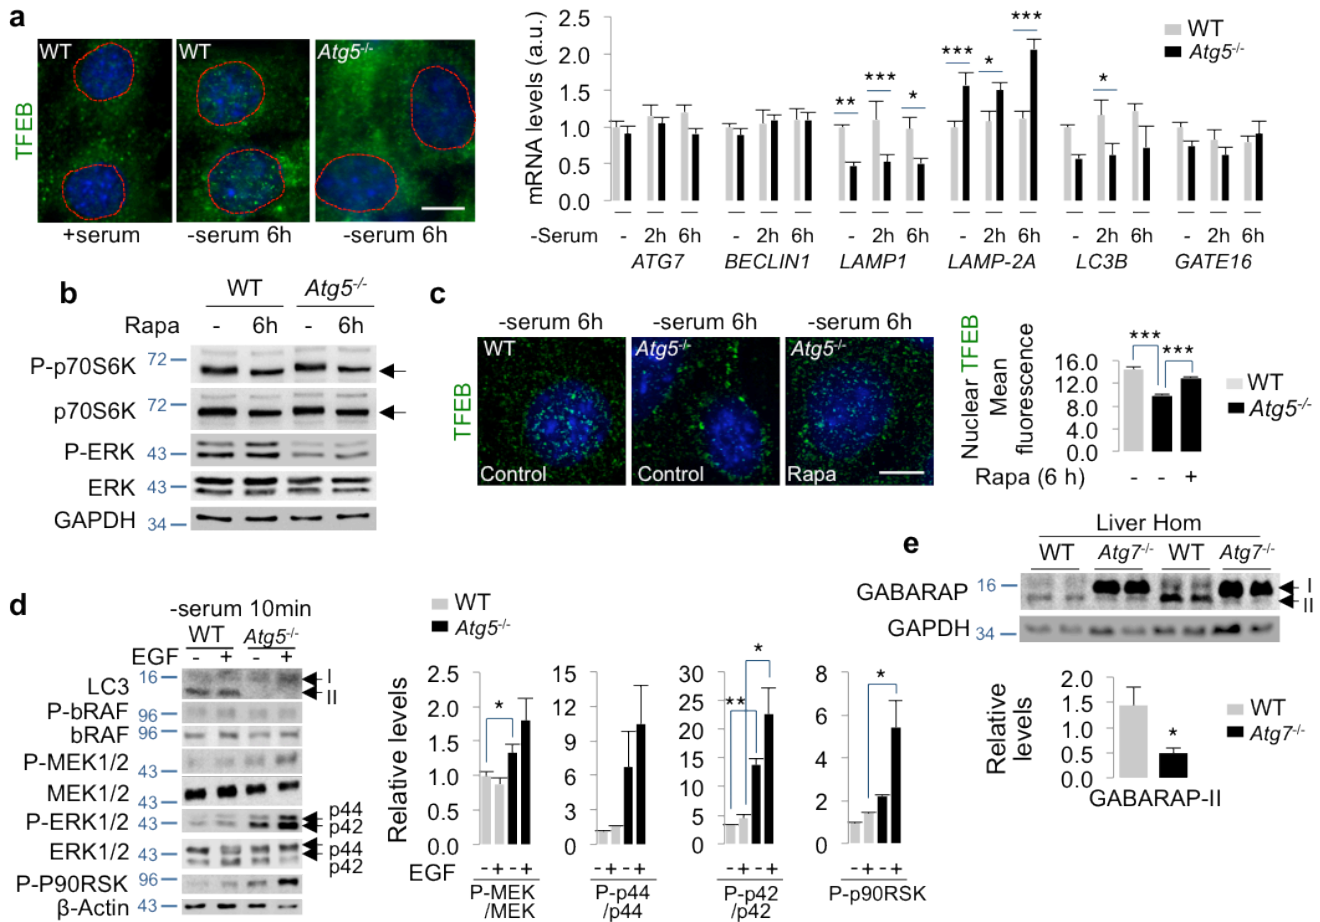

**Supplementary Figure S8 (a)** Decreased ERK phosphorylation in *Atg5*<sup>-/-</sup> MEFs associates with reduced nuclear TFEB levels and decreased *LC3B* and *LAMP1* gene expression. Immunofluorescence (IF) for TFEB in 6 h serum-fed or serum-starved WT and *Atg5*<sup>-/-</sup> MEFs, n=3. mRNA levels for indicated genes in serum-fed, 2 h and 6 h serum-starved WT and *Atg5*<sup>-/-</sup> MEFs. Scale bar, 10  $\mu$ m. Bars represent mean  $\pm$  s.e.m. \* $P$ <0.05, \*\* $P$ <0.01, \*\*\* $P$ <0.001; ANOVA-Bonferroni *post hoc* test, n = 3. **(b)** Immunoblots for P- and total p70S6K and ERK, and GAPDH in WT and *Atg5*<sup>-/-</sup> MEFs treated or not with rapamycin (Rapa), n=3. **(c)** IF for TFEB (stained in green) in 6 h serum starved WT and *Atg5*<sup>-/-</sup> MEFs exposed to Rapa or not. Scale bar, 10  $\mu$ m. Bars represent mean  $\pm$  s.e.m. \*\*\* $P$ <0.001; Student's *t*-test, 50 cells analyzed from 2 experiments. **(d)** Increased MEK and ERK phosphorylation in *Atg5*<sup>-/-</sup> MEFs during early nutrient deprivation (-serum 10 min). Immunoblots for LC3, P- and total bRAF, P- and total MEK and ERK, P-p90RSK and  $\beta$ -actin from 10 min serum-deprived WT and *Atg5*<sup>-/-</sup> MEFs in presence or absence of EGF. LC3-I and LC3-II are indicated. Bars represent mean  $\pm$  s.e.m. \* $P$ <0.05, \*\* $P$ <0.01; Student's *t*-test, n = 3. **(e)** GABARAP-II levels are reduced in *Atg7*<sup>-/-</sup> livers. Immunoblots showing GABARAP and GAPDH levels in homogenates from WT and *Atg7*<sup>-/-</sup> livers. Bars represent mean  $\pm$  s.e.m.  $P$ <0.05; Student's *t*-test, n = 4. GABARAP-I and GABARAP-II are indicated. Nuclei are in blue (DAPI).



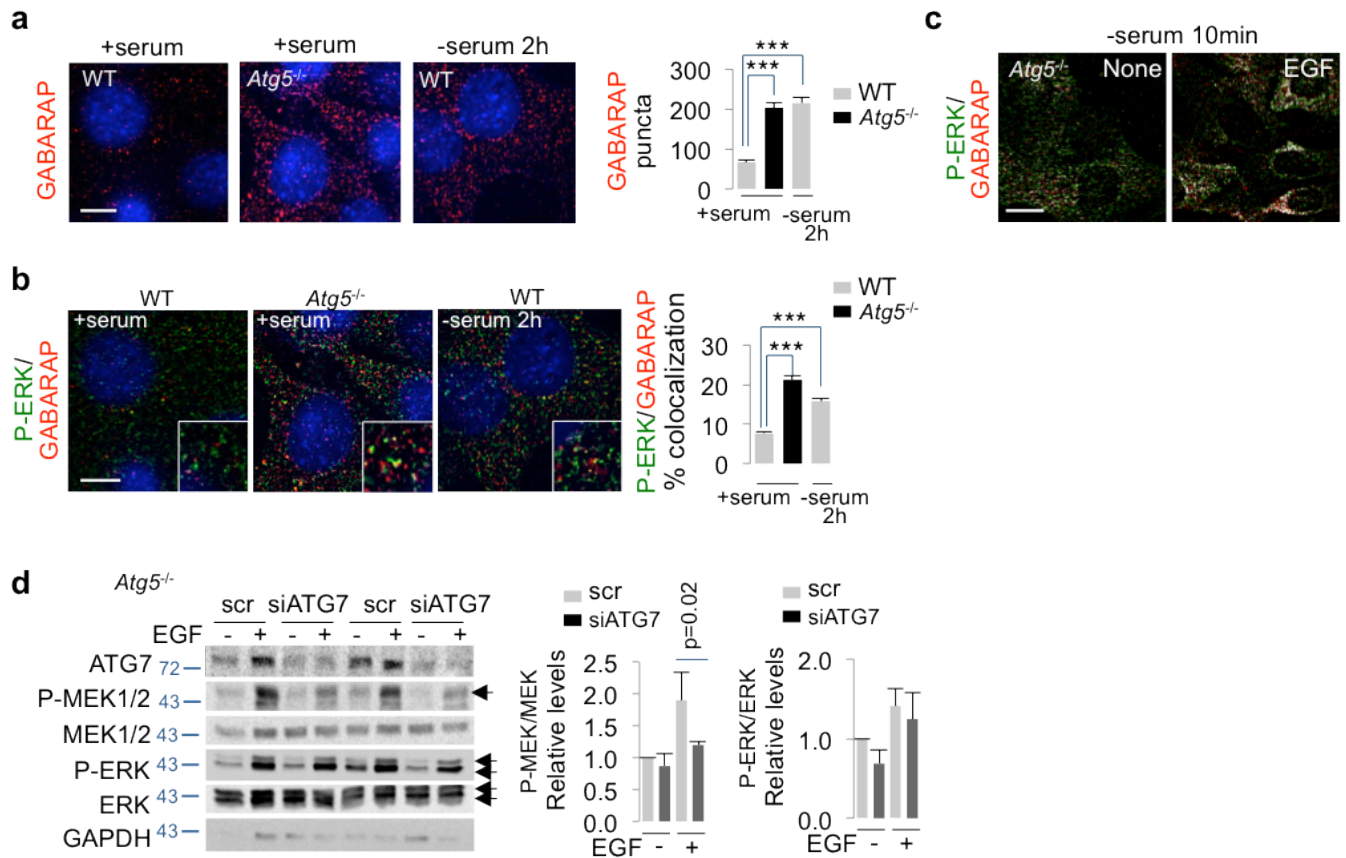

**Supplementary Figure S9 (a)** Increased GABARAP puncta in serum-fed *Atg5<sup>-/-</sup>* MEFs. Immunofluorescence (IF) depicting GABARAP puncta (red) in serum-fed WT and *Atg5<sup>-/-</sup>* MEFs, and in 2 h serum-starved WT MEFs. Scale bar, 10  $\mu$ m. Bars represent mean  $\pm$  s.e.m. \*\*\* $P$ <0.001; Student's *t*-test, 60 cells analyzed from 2 experiments. **(b)** Increased P-ERK/GABARAP colocalization in serum-fed *Atg5<sup>-/-</sup>* MEFs. IF showing P-ERK (green) and GABARAP (red) in WT and *Atg5<sup>-/-</sup>* MEFs in presence or absence of serum (2 h). Scale bar, 10  $\mu$ m. Bars represent mean  $\pm$  s.e.m. \*\*\* $P$ <0.001; Student's *t*-test, 60 cells analyzed from 2 experiments. **(c)** Increased P-ERK/GABARAP colocalization in EGF-treated *Atg5<sup>-/-</sup>* MEFs. IF for P-ERK (green) and GABARAP (red) in serum-starved (10 min) *Atg5<sup>-/-</sup>* MEFs treated with or without EGF (10 min). Colocalization (white pixels) highlighted by "colocalization finder" application. 60 cells were analyzed from 2 experiments. Scale bar, 10  $\mu$ m. **(d)** Depleting ATG7 in *Atg5<sup>-/-</sup>* MEFs compromises EGF-induced MEK phosphorylation. Immunoblots for ATG7, P- and total MEK and ERK, and GAPDH from *Atg5<sup>-/-</sup>* MEFs transfected with scr or siATG7 in presence or absence of EGF. Bars represent mean  $\pm$  s.e.m. \* $P$ <0.05; Student's *t*-test,  $n = 3$ .

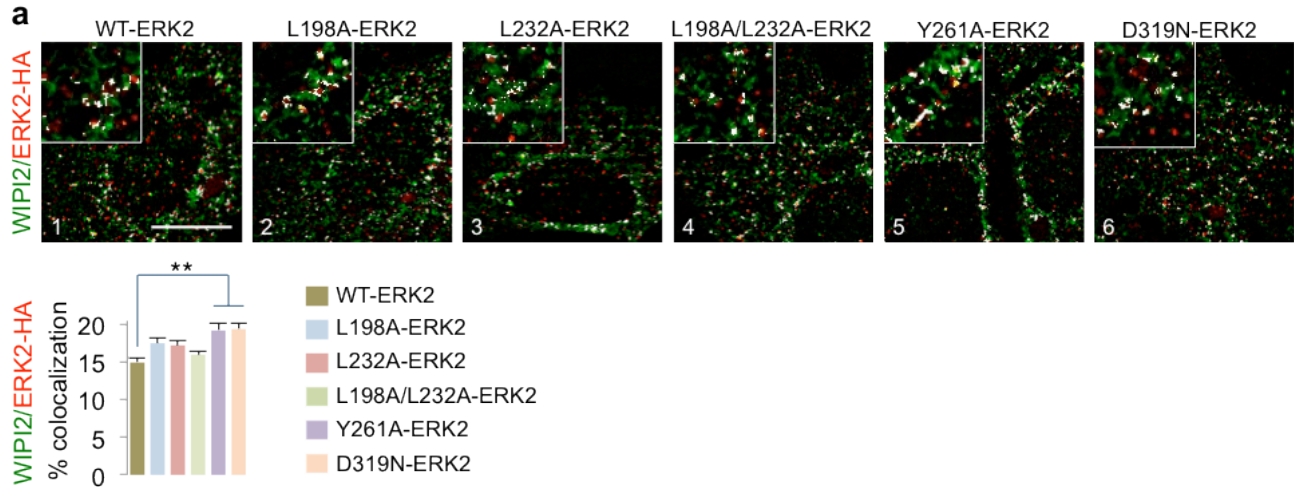

**b**

```

>gi|16716341|ref|NP_444299.1| autophagy protein 5 [Mus musculus]
MTDDKDVLRDVWFGRIPCTFLYQDEITEREAEPYLLPRVSYLTLVTDKVKKHFKQVMRQEDVSEIWFYEGTPLKWHYPYIGLLFDL
LASSALPWNITVHFKSFPEKDLLHCPKDAVEAHFMSCMKEADALKHKSQVINEMQKQKDHKQLWMLQNDRFDDQFWAINRKLMEY
PPEENGFRYPFRYQTTTERPFIQKLFKRPVAADGQLHTLGDLLREVCPASAVAPEDGEKRSQVMIHGIEPMLETPLQWLSEHLSYPDNF
LHISVPQPTD

>gi|145966752|ref|NP_080493.2| ubiquitin-like protein ATG12 [Mus musculus]
MSEDSEVVLQLPSAPVGGESLPELSPETATPEPPSSAAVSPGTEEPPGDTKKKIDILLKAVGDTPIPKTKKWAVERTRTI
QGLIDFIKKFLKLVASEQLFIYVNSFAPSPDQEVGTLYECFGSDGKLVLYHCKSQAWG

>gi|13385664|ref|NP_080436.1| microtubule-associated proteins 1A/1B light chain 3B [Mus musculus]
MPSEKTFKQRRSFEQRVEDVRLIREQHPTKIPVIIERYKGEKQLPVLDTKFLVDPDHVNMSELIKiIRRRQLLANQAFFLLVNGHSM
VSVSTPISEVYESERDEDFGLYMYASQETFGTAMAV

>gi|9789961|ref|NP_062723.1| gamma-aminobutyric acid receptor-associated protein [Mus musculus]
MKFVYKEEHPFEKRRSEGEKIRKKYPDRVPVIVEKAPKARIGDLDKKKYLVPSDLTVGQFYFLIRKRIHLRAEDALFFVNNVIPPTSAT
MGQLYQEHEEDFFLYIAYSDESYYGL

>gi|22122367|ref|NP_666052.1| WD repeat domain phosphoinositide-interacting protein 1 [Mus musculus]
MEAEAADAPPGRVEAALSCFSFNQDCTSLAIGTKAGYKFLSSLSSVEQLDQVHGSNEIPDVYIVERLRFSSSLVVVVSHTKPRQMNVYHF
KKGTEICNYSYSSNILSIRLNQRLLVCLLEESYIHNIDMKLLKTVLDIPSNPTGLCALSINHSNSYLAYPGSQSTGEIVLYDGNLSKTV
TIAAHEGTLAAITFNSSGSKLASASEKGTVIRVFSVPEGQKLYEFRRGMKRYVTISLVSFMSDSQFLCASSNTETVHIFKMEHLTDSRPE
EPSTWSGYMGKMFMAATNYLPAQVSDMMNQDRAFATGRNLNFSGQKNICTLSTIQKLPRLLVASSDGHLYIYNLDPQDGGECVLKTH
SLLSSGTTEENKENDLRPSLPPSYAATVARPSTSAASTVPGYSEDGGALRGEVIPEHEFATGPVCLDDENEFPPIILCRGSQKGTKQS

>gi|30409972|ref|NP_848485.1| WD repeat domain phosphoinositide-interacting protein 2 [Mus musculus]
MNLASQSGEAGAGQLLFANFNQDNTSLAVGSKSGYKFFSLSSVDKLEQIYECTDTEDVCIVERLRFSSSLVAIVSLKAPRKLKVFCHKKG
TEICNYSYNTILAVKLNQRQLIVCLEESLYIHNIRDMLKVLHTIRETPPNPAGLCALSINNDNCYLAYPGSASIGEVQVFDITINLRAANMIP
AHDSPLAALAFDASGKTLATASEKGTVIRVFSIPEGQKLFEFRRGVKRCVSICSLAFSMDGMFLSASSNTETVHIFKLEAVREKPPEEPT
TWTGYFGKVLMASTSYLPSQVTEMFNQGRAFATVRLPFCGHKNICSLTTIQKIPRLLVGASDGYLYMYNLDLPQEGGECALMRQHRLD
GSMETTSEIVDSASHDCPLATQTYGTAAGAYVPSSPTRLGKGGQDANLEAYTDDLGAVGGACLEDEASALRLDEDSEHPPMILRTD

```

**Supplementary Figure S10** Mutations in ERK2 kinase-docking domains do not affect ERK2/WIPI2 colocalization. **(a)** Immunofluorescence showing colocalization of WT-ERK2-HA (red), FRS ERK2 mutants (L198A-, L232A-, L198A/L232A-, Y261A-ERK2-HA) (red) or common docking (CD) mutant (D319N-ERK2-HA) (red) with WIPI2 (green) in EGF-treated NIH/3T3 cells. Scale bar, 10  $\mu$ m. Bars represent mean  $\pm$  s.e.m. **\*\*** $P < 0.01$  compared to WT-ERK2-transfected cells; Student's *t*-test, 50 cells analyzed from 2 experiments. **(b)** ATG12 and LC3B display substrate D-domains required to interact with ERK2. Amino acid sequences for ATG5, ATG12, LC3B, GABARAP, WIPI1 and WIPI2 indicating the presence of D-domains, i.e., basic residues (K, lysine or R, arginine) followed by a hydrophobic LXL motif<sup>47</sup> in ATG12 and LC3B. D-domains in ATG12 and LC3B are in larger fonts and underlined in green.

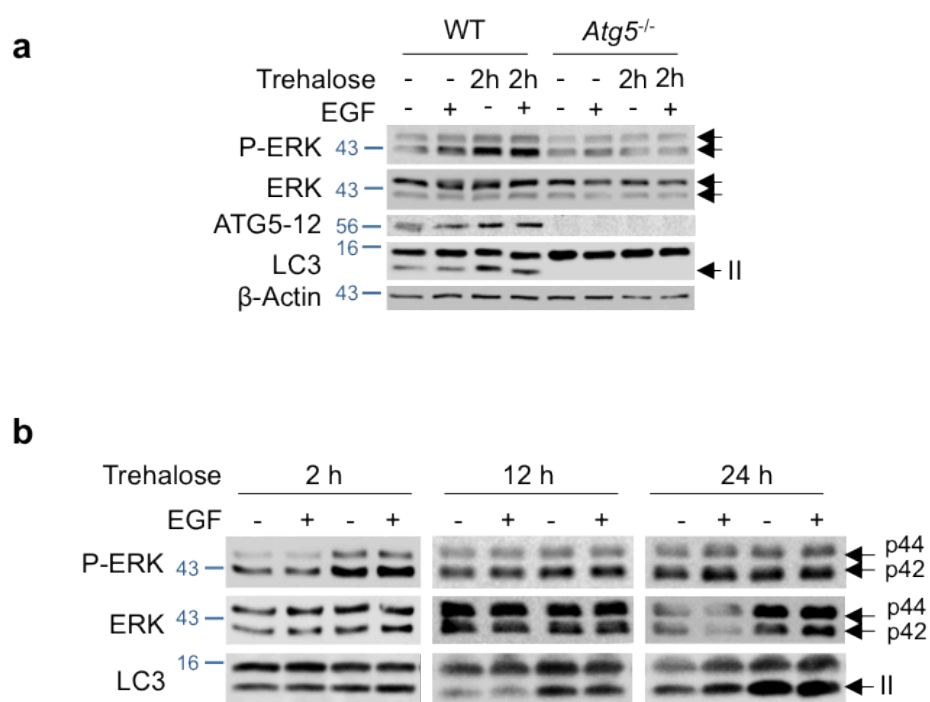

**Supplementary Figure S11 (a)** Acute trehalose exposure increases ERK phosphorylation that requires ATG5. Immunoblots for P- and total ERK, ATG5-ATG12, LC3 and  $\beta$ -actin in WT and *Atg5<sup>-/-</sup>* MEFs exposed to EGF in presence or absence of trehalose for 2 h, n = 3. **(b)** Prolonged exposure of cells to trehalose fails to increase ERK phosphorylation. Immunoblots for P- and total ERK, and LC3 in WT and *Atg5<sup>-/-</sup>* MEFs exposed to EGF in presence or absence of trehalose for 12 h and 24 h, n = 3.

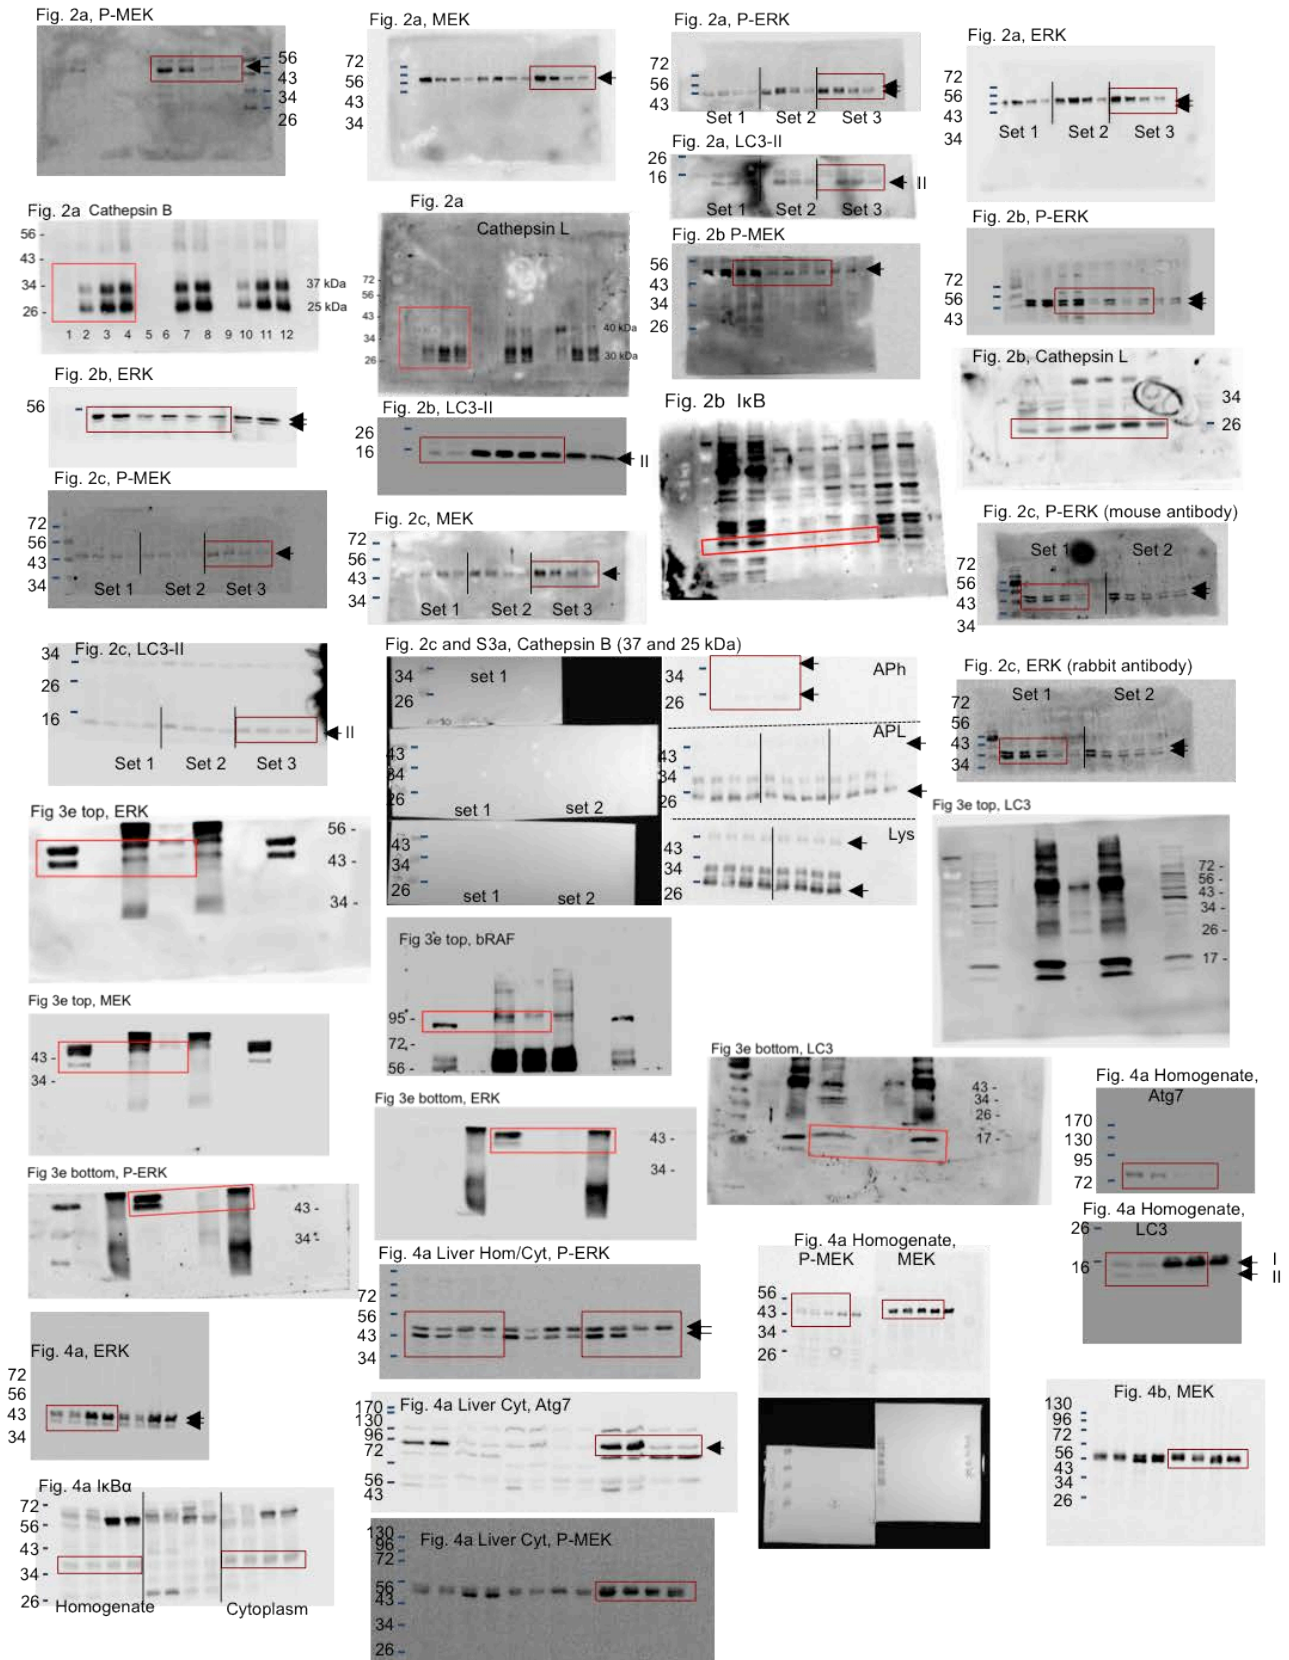

Supplementary Figure S12. Full-length uncropped images of gels displayed in the Main figures

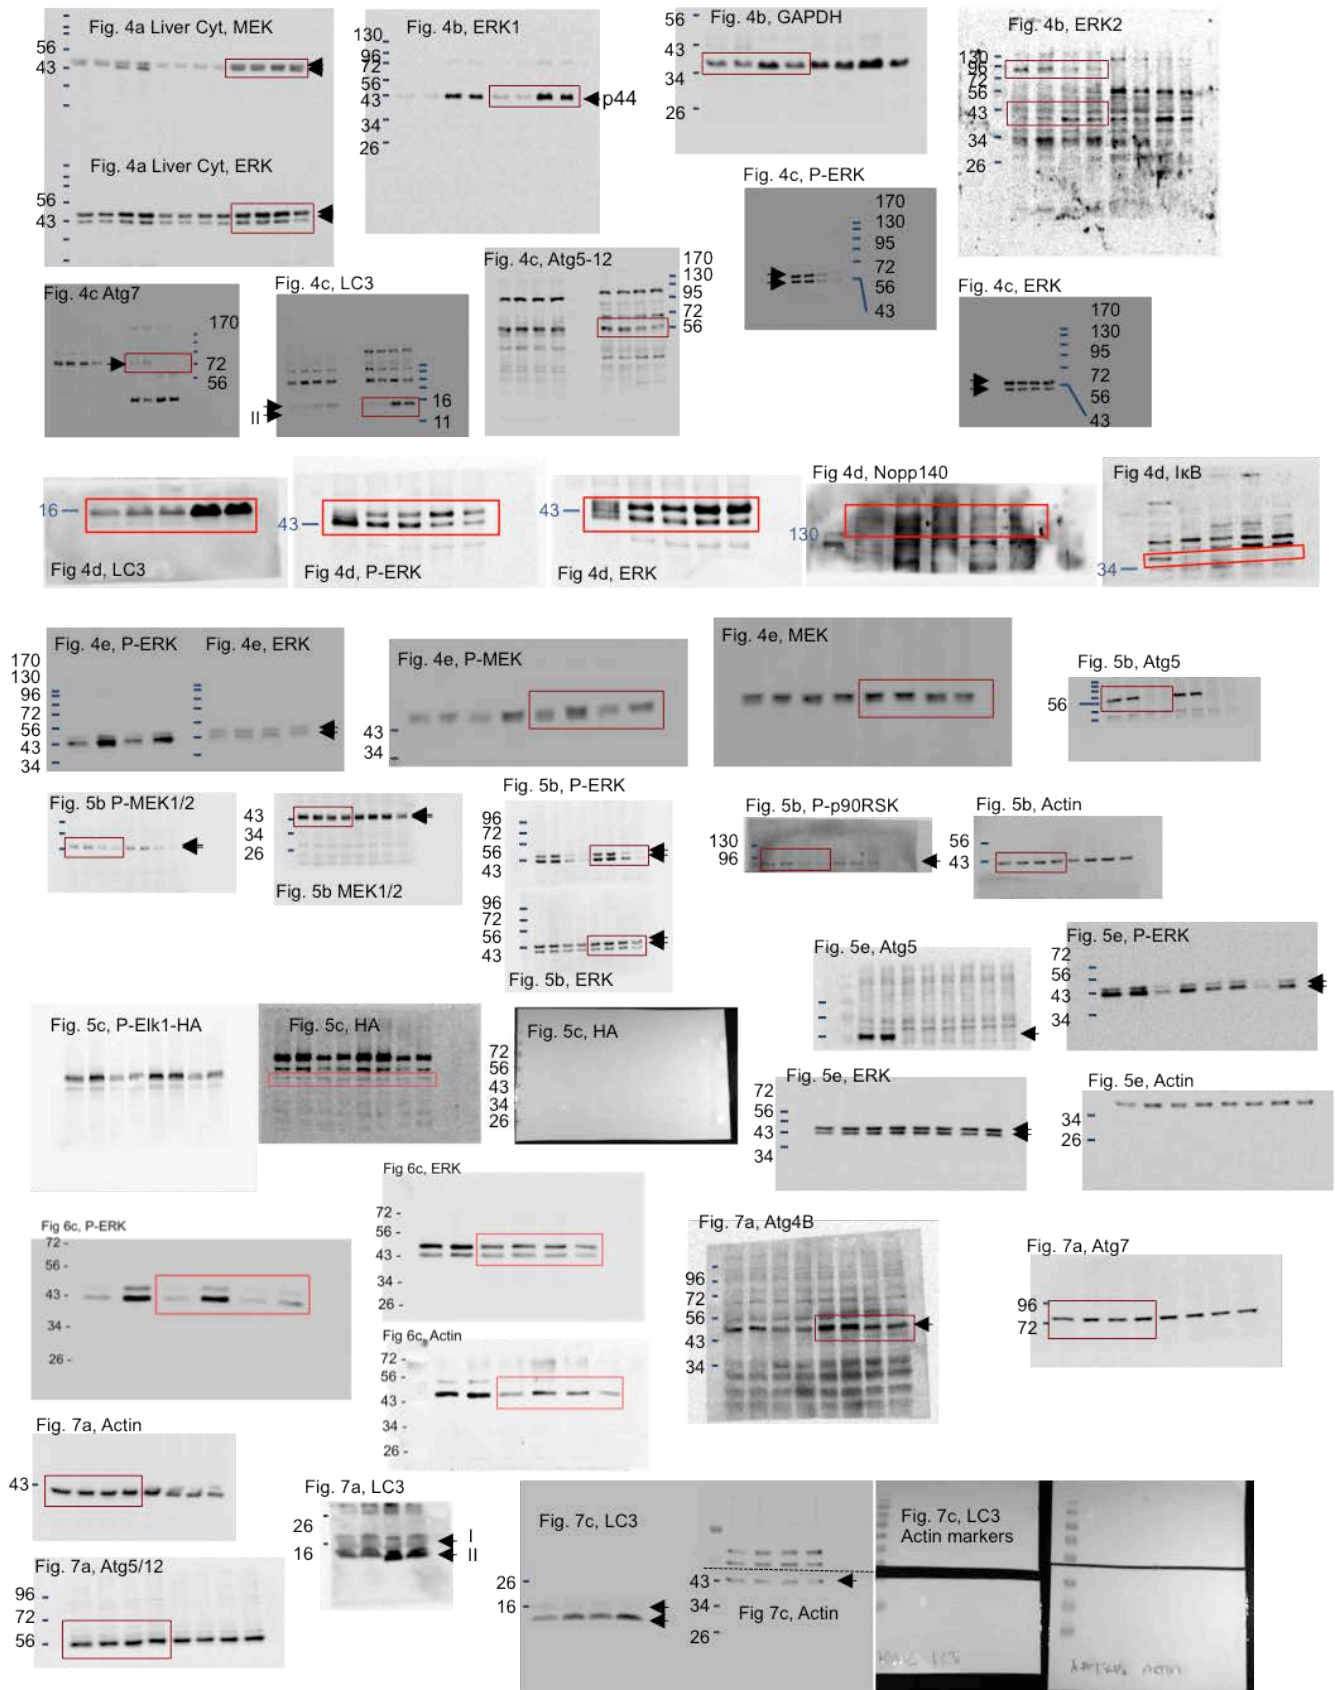

Supplementary Figure S13. Full-length uncropped images of gels displayed in the Main figures

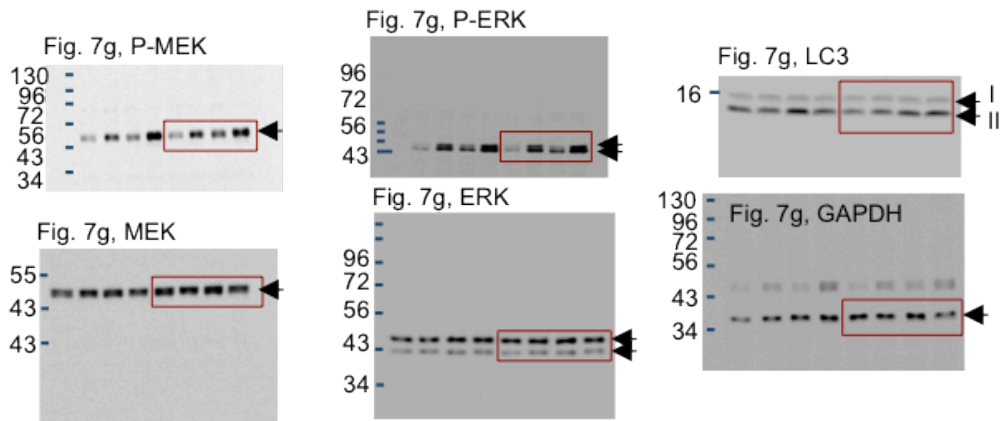

**Supplementary Figure S14.** Full-length uncropped images of gels displayed in the Main figures

**Supplementary Table S1.** List of antibodies used in this study

| Primary Antibody          | Source                     | Catalog #        | Western blot    | IF              | IP    |
|---------------------------|----------------------------|------------------|-----------------|-----------------|-------|
|                           |                            |                  | Dilution        | Dilution        |       |
| $\beta$ -Actin            | Abcam                      | ab8227           | 1:1000          |                 |       |
| ATG16                     | Santa Cruz                 | sc-70133         | 1:1000          | 1:200           |       |
| ATG4B                     | Cell Signaling             | 5299             | 1:1000          |                 |       |
| ATG5-ATG12                | Novus Biologicals          | NB110-53818      | 1:1000          | 1:200           |       |
| ATG7                      | Cell Signaling             | 2631             | 1:1000          | 1:50            |       |
| Beclin1                   | BD Biosciences             | 612112           | 1:500           | 1:200           |       |
| P-bRAF                    | Cell Signaling             | 2692             | 1:1000          | 1:250           |       |
| bRAF                      | Cell Signaling             | 9434             | 1:1000          |                 |       |
| Cathepsin B               | Santa Cruz                 | sc-6493          | 1:500           |                 |       |
| Cathepsin L               | Santa Cruz                 | sc-6498          | 1:500           |                 |       |
| P-c-Jun                   | Santa Cruz                 | sc-822           | 1:500           |                 |       |
| c-Jun                     | Santa Cruz                 | sc-45            | 1:500           |                 |       |
| P-cRAF                    | Cell Signaling             | 9427             | 1:1000          | 1:250           |       |
| cRAF                      | Cell Signaling             | 9422             | 1:1000          |                 |       |
| P-ELK-1                   | Cell Signaling             | 9181             | 1:1000          |                 |       |
| P-ERK                     | Cell Signaling             | 9101             | 1:1000          | 1:500           |       |
| ERK                       | Cell Signaling             | 9102             | 1:1000          | 1:500           |       |
| P-ERK                     | Cell Signaling             | 9106             | 1:1000          | 1:500           |       |
| ERK                       | Cell Signaling             | 4696             | 1:1000          | 1:500           |       |
| ERK1                      | Cell Signaling             | 4372             | 1:1000          |                 |       |
| ERK2                      | Cell Signaling             | 9108             | 1:1000          |                 |       |
| GABARAP/GATE-16           | Santa Cruz                 | sc-28938         | 1:500           | 1:50            |       |
| GAPDH                     | Abcam                      | ab8245           | 1:1000          |                 |       |
| HA                        | Cell Signaling             | 2367             | 1:1000          |                 |       |
| IKB                       | Santa Cruz                 | sc-371           | 1:1000          |                 |       |
| JL-8                      | Clontech                   | 632380           | 1:10,000        |                 |       |
| P-JNK                     | Santa Cruz                 | sc-62254         | 1:1000          |                 |       |
| JNK                       | Santa Cruz                 | sc-571           | 1:1000          |                 |       |
| KSR1                      | Cell Signaling             | 4640             | 1:1000          | 1:250           |       |
| LC3                       | Cell Signaling             | 2775             | 1:1000          | 1:50            |       |
| LC3                       | MBL                        | PM036            | 1:1000          |                 | 1:200 |
| LC3                       | MBL                        | M152-3           |                 | 1:200           |       |
| P-MEK                     | Cell Signaling             | 9154             | 1:1000          | 1:250           |       |
| MEK                       | Cell Signaling             | 9122             | 1:1000          | 1:250           |       |
| P-mTOR                    | Cell Signaling             | 2971             | 1:1000          |                 |       |
| mTOR                      | Cell Signaling             | 2972             | 1:1000          |                 |       |
| Nopp140                   | Dr. U. Thomas Meier, AECOM | -                | 1:500           |                 |       |
| P-p90RSK                  | Cell Signaling             | 9344             | 1:1000          |                 |       |
| P-p70S6K                  | Cell Signaling             | 9205             | 1:1000          |                 |       |
| p70S6K                    | Cell Signaling             | 9202             | 1:1000          |                 |       |
| Rab7                      | Santa Cruz                 | sc-10767         | 1:1000          |                 |       |
| P-STAT3                   | Cell Signaling             | 9145             | 1:1000          |                 |       |
| STAT3                     | Cell Signaling             | 4904             | 1:1000          |                 |       |
| TFEB                      | Santa Cruz                 | sc-48784         |                 | 1:100           |       |
| P-ULK1                    | Cell Signaling             | 5869             | 1:1000          | 1:100           |       |
| ULK1                      | Novus Biologicals          | NB110-74844      | 1:500           |                 |       |
| Vps34                     | Invitrogen                 | 382100           |                 | 1:200           |       |
| WIPI-1                    | Abcam                      | ab128901         |                 | 1:100           |       |
| WIPI-2                    | Abcam                      | ab105459         |                 | 1:100           |       |
| STAT3                     | Cell Signaling             | 4904             | 1:1000          |                 |       |
| TFEB                      | Santa Cruz                 | sc-48784         |                 | 1:100           |       |
| P-ULK1                    | Cell Signaling             | 5869             | 1:1000          | 1:100           |       |
|                           |                            |                  |                 |                 |       |
| <b>Secondary Antibody</b> | <b>Source</b>              | <b>Catalog #</b> | <b>Dilution</b> | <b>Dilution</b> |       |
| HRP-Rabbit anti-Mouse     | Invitrogen                 | 61-6520          | 1:5000          |                 |       |
| HRP-Goat anti-Rabbit      | Invitrogen                 | 65-6120          | 1:5000          |                 |       |
| HRP-Rabbit anti-Goat      | Invitrogen                 | 61-1620          | 1:5000          |                 |       |
| Goat anti-Rabbit 448      | Invitrogen                 | A11008           |                 | 1:500           |       |
| Goat anti-Rabbit 647      | Invitrogen                 | A21245           |                 | 1:500           |       |
| Goat anti-Mouse 448       | Invitrogen                 | A11029           |                 | 1:500           |       |
| Goat anti-Mouse 647       | Invitrogen                 | A21235           |                 | 1:500           |       |
| Chicken anti-Goat 488     | Invitrogen                 | A21467           |                 | 1:600           |       |
| Donkey anti-Rabbit 647    | Invitrogen                 | A31573           |                 | 1:500           |       |
